# Supplementary material for: Autumn – winter minimum temperature changes in the southern Sikhote-Alin mountain range of northeast Asia since 1509 AD
Source: Copernicus journal article supplement (doi:10.5194/cp-2017-98), 2017-08-14
Supplement: Supplementary file 1 [file Ukhvatkina_et_al_VUSr.xlsx]

## Sheet: Лист3
Year	Trec_-8-12	Mean+0.5	Mean-0.5	Mean	smoth
1451	-8.311	-7.04201	-10.0536	-8.5478	0
1452	-7.77625	-7.04201	-10.0536	-8.5478	0
1453	-7.04	-7.04201	-10.0536	-8.5478	0
1454	-8.19475	-7.04201	-10.0536	-8.5478	0
1455	-8.0475	-7.04201	-10.0536	-8.5478	0
1456	-8.8845	-7.04201	-10.0536	-8.5478	0
1457	-8.75275	-7.04201	-10.0536	-8.5478	0
1458	-5.1025	-7.04201	-10.0536	-8.5478	0
1459	-9.12475	-7.04201	-10.0536	-8.5478	0
1460	-9.4425	-7.04201	-10.0536	-8.5478	-8.69036
1461	-7.8925	-7.04201	-10.0536	-8.5478	-8.78453
1462	-9.40375	-7.04201	-10.0536	-8.5478	-8.9155
1463	-9.55875	-7.04201	-10.0536	-8.5478	-8.9961
1464	-8.44275	-7.04201	-10.0536	-8.5478	-9.04725
1465	-9.4115	-7.04201	-10.0536	-8.5478	-9.04299
1466	-8.6985	-7.04201	-10.0536	-8.5478	-9.0116
1467	-8.45825	-7.04201	-10.0536	-8.5478	-8.99416
1468	-10.4345	-7.04201	-10.0536	-8.5478	-9.09453
1469	-10.7677	-7.04201	-10.0536	-8.5478	-9.01547
1470	-10.0625	-7.04201	-10.0536	-8.5478	-9.02478
1471	-10.1943	-7.04201	-10.0536	-8.5478	-9.07825
1472	-10.3957	-7.04201	-10.0536	-8.5478	-8.98874
1473	-8.652	-7.04201	-10.0536	-8.5478	-8.84536
1474	-9.21775	-7.04201	-10.0536	-8.5478	-8.8132
1475	-7.96225	-7.04201	-10.0536	-8.5478	-8.69385
1476	-8.25675	-7.04201	-10.0536	-8.5478	-8.61519
1477	-8.404	-7.04201	-10.0536	-8.5478	-8.59
1478	-7.10975	-7.04201	-10.0536	-8.5478	-8.4443
1479	-7.54375	-7.04201	-10.0536	-8.5478	-8.18777
1480	-9.6285	-7.04201	-10.0536	-8.5478	-8.06067
1481	-8.962	-7.04201	-10.0536	-8.5478	-8.08547
1482	-7.6135	-7.04201	-10.0536	-8.5478	-8.06532
1483	-6.69125	-7.04201	-10.0536	-8.5478	-8.09826
1484	-7.7995	-7.04201	-10.0536	-8.5478	-8.13624
1485	-7.0245	-7.04201	-10.0536	-8.5478	-8.27031
1486	-7.12525	-7.04201	-10.0536	-8.5478	-8.38424
1487	-7.9545	-7.04201	-10.0536	-8.5478	-8.47297
1488	-7.5205	-7.04201	-10.0536	-8.5478	-8.60201
1489	-5.63725	-7.04201	-10.0536	-8.5478	-8.66246
1490	-7.5205	-7.04201	-10.0536	-8.5478	-8.35246
1491	-10.6902	-7.04201	-10.0536	-8.5478	-8.25016
1492	-9.99275	-7.04201	-10.0536	-8.5478	-8.32262
1493	-9.31075	-7.04201	-10.0536	-8.5478	-8.44469
1494	-9.97725	-7.04201	-10.0536	-8.5478	-8.49584
1495	-10.6438	-7.04201	-10.0536	-8.5478	-8.59969
1496	-10.5352	-7.04201	-10.0536	-8.5478	-8.68726
1497	-10.1788	-7.04201	-10.0536	-8.5478	-8.67099
1498	-9.6905	-7.04201	-10.0536	-8.5478	-8.62604
1499	-8.75275	-7.04201	-10.0536	-8.5478	-8.69424
1500	-3.4285	-7.04201	-10.0536	-8.5478	-8.66169
1501	-6.916	-7.04201	-10.0536	-8.5478	-8.47104
1502	-9.06275	-7.04201	-10.0536	-8.5478	-8.42686
1503	-9.1325	-7.04201	-10.0536	-8.5478	-8.45244
1504	-8.8225	-7.04201	-10.0536	-8.5478	-8.33657
1505	-9.1015	-7.04201	-10.0536	-8.5478	-8.16762
1506	-8.87675	-7.04201	-10.0536	-8.5478	-8.12422
1507	-7.629	-7.04201	-10.0536	-8.5478	-8.00914
1508	-6.6215	-7.04201	-10.0536	-8.5478	-7.79098
1509	-7.00125	-7.04201	-10.0536	-8.5478	-7.71154
1510	-6.8695	-7.04201	-10.0536	-8.5478	-7.90374
1511	-6.87725	-7.04201	-10.0536	-8.5478	-7.9483
1512	-9.10925	-7.04201	-10.0536	-8.5478	-7.95334
1513	-9.82225	-7.04201	-10.0536	-8.5478	-7.85414
1514	-7.66	-7.04201	-10.0536	-8.5478	-7.75184
1515	-7.26475	-7.04201	-10.0536	-8.5478	-7.57901
1516	-9.66725	-7.04201	-10.0536	-8.5478	-7.5701
1517	-7.877	-7.04201	-10.0536	-8.5478	-7.55111
1518	-5.32725	-7.04201	-10.0536	-8.5478	-7.52747
1519	-7.164	-7.04201	-10.0536	-8.5478	-7.51546
1520	-7.2725	-7.04201	-10.0536	-8.5478	-7.57979
1521	-7.80725	-7.04201	-10.0536	-8.5478	-7.7158
1522	-9.1635	-7.04201	-10.0536	-8.5478	-7.6321
1523	-7.1485	-7.04201	-10.0536	-8.5478	-7.66852
1524	-6.7765	-7.04201	-10.0536	-8.5478	-7.68945
1525	-5.645	-7.04201	-10.0536	-8.5478	-7.73944
1526	-8.6985	-7.04201	-10.0536	-8.5478	-7.64411
1527	-7.24925	-7.04201	-10.0536	-8.5478	-7.59219
1528	-6.14875	-7.04201	-10.0536	-8.5478	-7.71231
1529	-6.761	-7.04201	-10.0536	-8.5478	-7.83321
1530	-8.156	-7.04201	-10.0536	-8.5478	-7.97504
1531	-9.5975	-7.04201	-10.0536	-8.5478	-8.05525
1532	-7.43525	-7.04201	-10.0536	-8.5478	-8.05912
1533	-10.5508	-7.04201	-10.0536	-8.5478	-8.23234
1534	-8.0785	-7.04201	-10.0536	-8.5478	-8.34781
1535	-8.2645	-7.04201	-10.0536	-8.5478	-8.52064
1536	-7.76075	-7.04201	-10.0536	-8.5478	-8.53304
1537	-6.8385	-7.04201	-10.0536	-8.5478	-8.58147
1538	-7.72975	-7.04201	-10.0536	-8.5478	-8.65549
1539	-9.582	-7.04201	-10.0536	-8.5478	-8.83257
1540	-10.109	-7.04201	-10.0536	-8.5478	-8.9403
1541	-9.4115	-7.04201	-10.0536	-8.5478	-8.993
1542	-9.241	-7.04201	-10.0536	-8.5478	-9.04376
1543	-10.6128	-7.04201	-10.0536	-8.5478	-9.02013
1544	-9.086	-7.04201	-10.0536	-8.5478	-9.11932
1545	-9.1015	-7.04201	-10.0536	-8.5478	-9.14723
1546	-8.9465	-7.04201	-10.0536	-8.5478	-9.2007
1547	-8.218	-7.04201	-10.0536	-8.5478	-9.29331
1548	-7.629	-7.04201	-10.0536	-8.5478	-9.33633
1549	-10.3027	-7.04201	-10.0536	-8.5478	-9.28091
1550	-10.3105	-7.04201	-10.0536	-8.5478	-9.23945
1551	-10.6515	-7.04201	-10.0536	-8.5478	-9.15769
1552	-8.4505	-7.04201	-10.0536	-8.5478	-8.96316
1553	-10.078	-7.04201	-10.0536	-8.5478	-8.81863
1554	-10.0625	-7.04201	-10.0536	-8.5478	-8.60008
1555	-8.8225	-7.04201	-10.0536	-8.5478	-8.46135
1556	-8.83025	-7.04201	-10.0536	-8.5478	-8.32146
1557	-8.69075	-7.04201	-10.0536	-8.5478	-8.2986
1558	-8.59	-7.04201	-10.0536	-8.5478	-8.26683
1559	-8.47375	-7.04201	-10.0536	-8.5478	-8.17731
1560	-9.27975	-7.04201	-10.0536	-8.5478	-8.06804
1561	-7.77625	-7.04201	-10.0536	-8.5478	-7.9266
1562	-5.3505	-7.04201	-10.0536	-8.5478	-7.80996
1563	-7.722	-7.04201	-10.0536	-8.5478	-7.62667
1564	-4.715	-7.04201	-10.0536	-8.5478	-7.35775
1565	-6.327	-7.04201	-10.0536	-8.5478	-7.31203
1566	-6.14875	-7.04201	-10.0536	-8.5478	-7.32481
1567	-7.76075	-7.04201	-10.0536	-8.5478	-7.28994
1568	-6.9935	-7.04201	-10.0536	-8.5478	-7.23491
1569	-8.5125	-7.04201	-10.0536	-8.5478	-7.27676
1570	-8.125	-7.04201	-10.0536	-8.5478	-7.11634
1571	-7.82275	-7.04201	-10.0536	-8.5478	-7.03496
1572	-6.11775	-7.04201	-10.0536	-8.5478	-7.07565
1573	-6.41225	-7.04201	-10.0536	-8.5478	-7.10316
1574	-4.684	-7.04201	-10.0536	-8.5478	-7.21283
1575	-7.908	-7.04201	-10.0536	-8.5478	-7.33373
1576	-9.086	-7.04201	-10.0536	-8.5478	-7.44455
1577	-7.99325	-7.04201	-10.0536	-8.5478	-7.4647
1578	-7.4895	-7.04201	-10.0536	-8.5478	-7.57397
1579	-9.31075	-7.04201	-10.0536	-8.5478	-7.57824
1580	-6.07125	-7.04201	-10.0536	-8.5478	-7.58328
1581	-6.14875	-7.04201	-10.0536	-8.5478	-7.64256
1582	-6.16425	-7.04201	-10.0536	-8.5478	-7.77857
1583	-8.27225	-7.04201	-10.0536	-8.5478	-7.91691
1584	-6.90825	-7.04201	-10.0536	-8.5478	-8.14786
1585	-8.745	-7.04201	-10.0536	-8.5478	-8.26915
1586	-8.36525	-7.04201	-10.0536	-8.5478	-8.21025
1587	-8.16375	-7.04201	-10.0536	-8.5478	-8.29008
1588	-9.179	-7.04201	-10.0536	-8.5478	-8.30558
1589	-8.59775	-7.04201	-10.0536	-8.5478	-8.31333
1590	-8.22575	-7.04201	-10.0536	-8.5478	-8.46716
1591	-9.0085	-7.04201	-10.0536	-8.5478	-8.61286
1592	-8.838	-7.04201	-10.0536	-8.5478	-8.70547
1593	-9.179	-7.04201	-10.0536	-8.5478	-8.74268
1594	-9.303	-7.04201	-10.0536	-8.5478	-8.70819
1595	-10.3337	-7.04201	-10.0536	-8.5478	-8.73027
1596	-7.908	-7.04201	-10.0536	-8.5478	-8.60046
1597	-9.58975	-7.04201	-10.0536	-8.5478	-8.48847
1598	-7.7995	-7.04201	-10.0536	-8.5478	-8.49778
1599	-9.46575	-7.04201	-10.0536	-8.5478	-8.49429
1600	-9.148	-7.04201	-10.0536	-8.5478	-8.5094
1601	-9.06275	-7.04201	-10.0536	-8.5478	-8.52219
1602	-8.0165	-7.04201	-10.0536	-8.5478	-8.55551
1603	-9.01625	-7.04201	-10.0536	-8.5478	-8.53963
1604	-6.2185	-7.04201	-10.0536	-8.5478	-8.44004
1605	-9.18675	-7.04201	-10.0536	-8.5478	-8.23118
1606	-5.769	-7.04201	-10.0536	-8.5478	-8.16724
1607	-5.924	-7.04201	-10.0536	-8.5478	-8.17886
1608	-9.365	-7.04201	-10.0536	-8.5478	-8.1622
1609	-8.528	-7.04201	-10.0536	-8.5478	-8.18041
1610	-8.528	-7.04201	-10.0536	-8.5478	-8.20056
1611	-9.26425	-7.04201	-10.0536	-8.5478	-8.16995
1612	-9.5045	-7.04201	-10.0536	-8.5478	-8.1839
1613	-8.86125	-7.04201	-10.0536	-8.5478	-8.21451
1614	-7.31125	-7.04201	-10.0536	-8.5478	-8.31526
1615	-6.1565	-7.04201	-10.0536	-8.5478	-8.28659
1616	-6.62925	-7.04201	-10.0536	-8.5478	-8.43151
1617	-9.82225	-7.04201	-10.0536	-8.5478	-8.4815
1618	-7.46625	-7.04201	-10.0536	-8.5478	-8.42609
1619	-9.83	-7.04201	-10.0536	-8.5478	-8.32728
1620	-9.551	-7.04201	-10.0536	-8.5478	-8.28388
1621	-8.4505	-7.04201	-10.0536	-8.5478	-8.31488
1622	-8.2955	-7.04201	-10.0536	-8.5478	-8.27729
1623	-9.6285	-7.04201	-10.0536	-8.5478	-8.28426
1624	-8.2335	-7.04201	-10.0536	-8.5478	-8.41253
1625	-8.61325	-7.04201	-10.0536	-8.5478	-8.59736
1626	-8.6675	-7.04201	-10.0536	-8.5478	-8.6706
1627	-6.92375	-7.04201	-10.0536	-8.5478	-8.58767
1628	-8.25675	-7.04201	-10.0536	-8.5478	-8.66711
1629	-6.55175	-7.04201	-10.0536	-8.5478	-8.50398
1630	-7.66	-7.04201	-10.0536	-8.5478	-8.43345
1631	-9.88425	-7.04201	-10.0536	-8.5478	-8.41136
1632	-8.75275	-7.04201	-10.0536	-8.5478	-8.43035
1633	-9.00075	-7.04201	-10.0536	-8.5478	-8.41679
1634	-9.8765	-7.04201	-10.0536	-8.5478	-8.42454
1635	-9.85325	-7.04201	-10.0536	-8.5478	-8.4877
1636	-8.094	-7.04201	-10.0536	-8.5478	-8.56636
1637	-8.16375	-7.04201	-10.0536	-8.5478	-8.8008
1638	-9.055	-7.04201	-10.0536	-8.5478	-8.9031
1639	-6.56725	-7.04201	-10.0536	-8.5478	-9.09646
1640	-8.1405	-7.04201	-10.0536	-8.5478	-9.17358
1641	-8.00875	-7.04201	-10.0536	-8.5478	-9.13289
1642	-8.67525	-7.04201	-10.0536	-8.5478	-9.17241
1643	-9.35725	-7.04201	-10.0536	-8.5478	-9.1511
1644	-8.3885	-7.04201	-10.0536	-8.5478	-9.08522
1645	-9.8765	-7.04201	-10.0536	-8.5478	-9.00927
1646	-10.2407	-7.04201	-10.0536	-8.5478	-9.01199
1647	-11.6125	-7.04201	-10.0536	-8.5478	-9.08794
1648	-10.3027	-7.04201	-10.0536	-8.5478	-9.05887
1649	-10.419	-7.04201	-10.0536	-8.5478	-9.23286
1650	-9.20225	-7.04201	-10.0536	-8.5478	-9.32354
1651	-9.0705	-7.04201	-10.0536	-8.5478	-9.40995
1652	-9.54325	-7.04201	-10.0536	-8.5478	-9.57425
1653	-8.5745	-7.04201	-10.0536	-8.5478	-9.60099
1654	-8.559	-7.04201	-10.0536	-8.5478	-9.69282
1655	-8.33425	-7.04201	-10.0536	-8.5478	-9.70484
1656	-8.14825	-7.04201	-10.0536	-8.5478	-9.69476
1657	-9.68275	-7.04201	-10.0536	-8.5478	-9.58394
1658	-8.47375	-7.04201	-10.0536	-8.5478	-9.52504
1659	-10.047	-7.04201	-10.0536	-8.5478	-9.47621
1660	-9.954	-7.04201	-10.0536	-8.5478	-9.41964
1661	-9.737	-7.04201	-10.0536	-8.5478	-9.39174
1662	-11.9612	-7.04201	-10.0536	-8.5478	-9.37081
1663	-9.892	-7.04201	-10.0536	-8.5478	-9.36849
1664	-10.2252	-7.04201	-10.0536	-8.5478	-9.37507
1665	-10.1167	-7.04201	-10.0536	-8.5478	-9.45994
1666	-10.0392	-7.04201	-10.0536	-8.5478	-9.46846
1667	-9.396	-7.04201	-10.0536	-8.5478	-9.49094
1668	-9.12475	-7.04201	-10.0536	-8.5478	-9.55139
1669	-9.4425	-7.04201	-10.0536	-8.5478	-9.50837
1670	-8.07075	-7.04201	-10.0536	-8.5478	-9.43281
1671	-8.5125	-7.04201	-10.0536	-8.5478	-9.42274
1672	-9.12475	-7.04201	-10.0536	-8.5478	-9.27432
1673	-8.528	-7.04201	-10.0536	-8.5478	-9.27781
1674	-8.69075	-7.04201	-10.0536	-8.5478	-9.24565
1675	-10.0315	-7.04201	-10.0536	-8.5478	-9.24914
1676	-8.31875	-7.04201	-10.0536	-8.5478	-9.23867
1677	-10.1322	-7.04201	-10.0536	-8.5478	-9.22318
1678	-9.68275	-7.04201	-10.0536	-8.5478	-9.21504
1679	-9.18675	-7.04201	-10.0536	-8.5478	-9.22162
1680	-8.44275	-7.04201	-10.0536	-8.5478	-9.26309
1681	-9.5355	-7.04201	-10.0536	-8.5478	-9.25534
1682	-8.993	-7.04201	-10.0536	-8.5478	-9.19062
1683	-9.96175	-7.04201	-10.0536	-8.5478	-9.18249
1684	-9.582	-7.04201	-10.0536	-8.5478	-9.17939
1685	-10.1865	-7.04201	-10.0536	-8.5478	-9.09685
1686	-9.83	-7.04201	-10.0536	-8.5478	-9.0612
1687	-9.086	-7.04201	-10.0536	-8.5478	-8.99687
1688	-8.962	-7.04201	-10.0536	-8.5478	-8.94534
1689	-9.57425	-7.04201	-10.0536	-8.5478	-8.97556
1690	-8.9	-7.04201	-10.0536	-8.5478	-8.97983
1691	-8.3575	-7.04201	-10.0536	-8.5478	-8.93332
1692	-7.8305	-7.04201	-10.0536	-8.5478	-8.86048
1693	-8.36525	-7.04201	-10.0536	-8.5478	-8.74461
1694	-8.62875	-7.04201	-10.0536	-8.5478	-8.72291
1695	-8.38075	-7.04201	-10.0536	-8.5478	-8.71361
1696	-7.60575	-7.04201	-10.0536	-8.5478	-8.69385
1697	-8.84575	-7.04201	-10.0536	-8.5478	-8.66789
1698	-8.652	-7.04201	-10.0536	-8.5478	-8.74655
1699	-9.79125	-7.04201	-10.0536	-8.5478	-8.8194
1700	-8.528	-7.04201	-10.0536	-8.5478	-8.86474
1701	-8.6055	-7.04201	-10.0536	-8.5478	-8.87559
1702	-7.536	-7.04201	-10.0536	-8.5478	-8.96084
1703	-7.6445	-7.04201	-10.0536	-8.5478	-8.95619
1704	-9.148	-7.04201	-10.0536	-8.5478	-8.93371
1705	-10.0005	-7.04201	-10.0536	-8.5478	-8.93526
1706	-9.43475	-7.04201	-10.0536	-8.5478	-9.01896
1707	-8.56675	-7.04201	-10.0536	-8.5478	-8.98525
1708	-10.5352	-7.04201	-10.0536	-8.5478	-8.962
1709	-11.0312	-7.04201	-10.0536	-8.5478	-8.90039
1710	-9.80675	-7.04201	-10.0536	-8.5478	-8.9186
1711	-8.5745	-7.04201	-10.0536	-8.5478	-8.92557
1712	-9.5355	-7.04201	-10.0536	-8.5478	-9.05694
1713	-8.27225	-7.04201	-10.0536	-8.5478	-9.14529
1714	-8.17925	-7.04201	-10.0536	-8.5478	-9.13715
1715	-8.41175	-7.04201	-10.0536	-8.5478	-9.11739
1716	-9.27975	-7.04201	-10.0536	-8.5478	-9.117
1717	-8.1715	-7.04201	-10.0536	-8.5478	-9.17512
1718	-8.187	-7.04201	-10.0536	-8.5478	-9.19179
1719	-8.559	-7.04201	-10.0536	-8.5478	-9.17551
1720	-8.89225	-7.04201	-10.0536	-8.5478	-9.21891
1721	-8.745	-7.04201	-10.0536	-8.5478	-9.27355
1722	-10.1632	-7.04201	-10.0536	-8.5478	-9.25146
1723	-9.4115	-7.04201	-10.0536	-8.5478	-9.31424
1724	-8.98525	-7.04201	-10.0536	-8.5478	-9.34989
1725	-9.60525	-7.04201	-10.0536	-8.5478	-9.40879
1726	-9.427	-7.04201	-10.0536	-8.5478	-9.32857
1727	-9.72925	-7.04201	-10.0536	-8.5478	-9.34795
1728	-10.8685	-7.04201	-10.0536	-8.5478	-9.25185
1729	-10.7058	-7.04201	-10.0536	-8.5478	-9.12049
1730	-10.6747	-7.04201	-10.0536	-8.5478	-8.96975
1731	-9.66725	-7.04201	-10.0536	-8.5478	-8.82134
1732	-9.09375	-7.04201	-10.0536	-8.5478	-8.70819
1733	-9.52775	-7.04201	-10.0536	-8.5478	-8.61131
1734	-8.89225	-7.04201	-10.0536	-8.5478	-8.60899
1735	-9.58975	-7.04201	-10.0536	-8.5478	-8.55706
1736	-7.6755	-7.04201	-10.0536	-8.5478	-8.50824
1737	-8.559	-7.04201	-10.0536	-8.5478	-8.49778
1738	-6.265	-7.04201	-10.0536	-8.5478	-8.45437
1739	-5.93175	-7.04201	-10.0536	-8.5478	-8.35285
1740	-5.8775	-7.04201	-10.0536	-8.5478	-8.2211
1741	-5.77675	-7.04201	-10.0536	-8.5478	-8.12229
1742	-7.90025	-7.04201	-10.0536	-8.5478	-8.08664
1743	-7.474	-7.04201	-10.0536	-8.5478	-8.00759
1744	-8.93875	-7.04201	-10.0536	-8.5478	-7.98201
1745	-8.56675	-7.04201	-10.0536	-8.5478	-7.93125
1746	-8.4505	-7.04201	-10.0536	-8.5478	-7.91343
1747	-9.52	-7.04201	-10.0536	-8.5478	-7.81732
1748	-10.0005	-7.04201	-10.0536	-8.5478	-7.87003
1749	-8.67525	-7.04201	-10.0536	-8.5478	-8.07501
1750	-8.03975	-7.04201	-10.0536	-8.5478	-8.19243
1751	-7.691	-7.04201	-10.0536	-8.5478	-8.34859
1752	-8.38075	-7.04201	-10.0536	-8.5478	-8.404
1753	-7.94675	-7.04201	-10.0536	-8.5478	-8.45554
1754	-8.38075	-7.04201	-10.0536	-8.5478	-8.4629
1755	-8.5745	-7.04201	-10.0536	-8.5478	-8.43113
1756	-7.319	-7.04201	-10.0536	-8.5478	-8.39082
1757	-6.637	-7.04201	-10.0536	-8.5478	-8.38269
1758	-7.319	-7.04201	-10.0536	-8.5478	-8.30093
1759	-10.0315	-7.04201	-10.0536	-8.5478	-8.27845
1760	-8.22575	-7.04201	-10.0536	-8.5478	-8.26683
1761	-8.9	-7.04201	-10.0536	-8.5478	-8.30015
1762	-9.0085	-7.04201	-10.0536	-8.5478	-8.27574
1763	-8.50475	-7.04201	-10.0536	-8.5478	-8.34277
1764	-9.086	-7.04201	-10.0536	-8.5478	-8.35014
1765	-7.93125	-7.04201	-10.0536	-8.5478	-8.32069
1766	-7.6445	-7.04201	-10.0536	-8.5478	-8.33076
1767	-9.35725	-7.04201	-10.0536	-8.5478	-8.34122
1768	-8.36525	-7.04201	-10.0536	-8.5478	-8.28426
1769	-8.22575	-7.04201	-10.0536	-8.5478	-8.06339
1770	-7.80725	-7.04201	-10.0536	-8.5478	-8.10872
1771	-8.3575	-7.04201	-10.0536	-8.5478	-8.03278
1772	-7.8925	-7.04201	-10.0536	-8.5478	-7.99286
1773	-9.2875	-7.04201	-10.0536	-8.5478	-8.06106
1774	-8.528	-7.04201	-10.0536	-8.5478	-8.05719
1775	-7.9855	-7.04201	-10.0536	-8.5478	-8.09051
1776	-7.5205	-7.04201	-10.0536	-8.5478	-8.12655
1777	-6.84625	-7.04201	-10.0536	-8.5478	-8.08741
1778	-6.17975	-7.04201	-10.0536	-8.5478	-8.0847
1779	-5.614	-7.04201	-10.0536	-8.5478	-8.13004
1780	-9.1325	-7.04201	-10.0536	-8.5478	-8.16762
1781	-7.381	-7.04201	-10.0536	-8.5478	-8.25365
1782	-8.21025	-7.04201	-10.0536	-8.5478	-8.29201
1783	-9.86875	-7.04201	-10.0536	-8.5478	-8.2335
1784	-9.0085	-7.04201	-10.0536	-8.5478	-8.28504
1785	-8.59775	-7.04201	-10.0536	-8.5478	-8.404
1786	-8.36525	-7.04201	-10.0536	-8.5478	-8.54234
1787	-8.5745	-7.04201	-10.0536	-8.5478	-8.74771
1788	-8.311	-7.04201	-10.0536	-8.5478	-8.96084
1789	-9.1325	-7.04201	-10.0536	-8.5478	-9.25689
1790	-8.559	-7.04201	-10.0536	-8.5478	-9.32121
1791	-10.078	-7.04201	-10.0536	-8.5478	-9.46769
1792	-8.65975	-7.04201	-10.0536	-8.5478	-9.53201
1793	-8.11725	-7.04201	-10.0536	-8.5478	-9.52349
1794	-9.55875	-7.04201	-10.0536	-8.5478	-9.52039
1795	-10.3648	-7.04201	-10.0536	-8.5478	-9.51612
1796	-10.2873	-7.04201	-10.0536	-8.5478	-9.51341
1797	-10.9537	-7.04201	-10.0536	-8.5478	-9.61842
1798	-10.4422	-7.04201	-10.0536	-8.5478	-9.70639
1799	-11.535	-7.04201	-10.0536	-8.5478	-9.78621
1800	-10.419	-7.04201	-10.0536	-8.5478	-9.85131
1801	-10.3105	-7.04201	-10.0536	-8.5478	-9.83542
1802	-9.49675	-7.04201	-10.0536	-8.5478	-9.89588
1803	-9.69825	-7.04201	-10.0536	-8.5478	-10.0354
1804	-8.9465	-7.04201	-10.0536	-8.5478	-10.0454
1805	-8.5125	-7.04201	-10.0536	-8.5478	-10.073
1806	-8.311	-7.04201	-10.0536	-8.5478	-10.0664
1807	-10.6747	-7.04201	-10.0536	-8.5478	-9.98461
1808	-10.0702	-7.04201	-10.0536	-8.5478	-9.92959
1809	-10.729	-7.04201	-10.0536	-8.5478	-9.79939
1810	-9.861	-7.04201	-10.0536	-8.5478	-9.74126
1811	-9.76025	-7.04201	-10.0536	-8.5478	-9.77769
1812	-9.86875	-7.04201	-10.0536	-8.5478	-9.7959
1813	-10.9073	-7.04201	-10.0536	-8.5478	-9.81799
1814	-9.76025	-7.04201	-10.0536	-8.5478	-9.87611
1815	-10.915	-7.04201	-10.0536	-8.5478	-9.98268
1816	-10.1555	-7.04201	-10.0536	-8.5478	-10.0272
1817	-9.3185	-7.04201	-10.0536	-8.5478	-9.97027
1818	-9.34175	-7.04201	-10.0536	-8.5478	-9.91835
1819	-8.931	-7.04201	-10.0536	-8.5478	-9.83387
1820	-9.2565	-7.04201	-10.0536	-8.5478	-9.78931
1821	-11.039	-7.04201	-10.0536	-8.5478	-9.73196
1822	-9.861	-7.04201	-10.0536	-8.5478	-9.67771
1823	-10.14	-7.04201	-10.0536	-8.5478	-9.59169
1824	-10.109	-7.04201	-10.0536	-8.5478	-9.57038
1825	-10.6438	-7.04201	-10.0536	-8.5478	-9.4642
1826	-9.20225	-7.04201	-10.0536	-8.5478	-9.42855
1827	-9.5355	-7.04201	-10.0536	-8.5478	-9.43863
1828	-9.03175	-7.04201	-10.0536	-8.5478	-9.44173
1829	-9.0395	-7.04201	-10.0536	-8.5478	-9.48551
1830	-8.96975	-7.04201	-10.0536	-8.5478	-9.53783
1831	-8.61325	-7.04201	-10.0536	-8.5478	-9.55487
1832	-8.78375	-7.04201	-10.0536	-8.5478	-9.59169
1833	-9.18675	-7.04201	-10.0536	-8.5478	-9.65136
1834	-9.334	-7.04201	-10.0536	-8.5478	-9.70329
1835	-8.7915	-7.04201	-10.0536	-8.5478	-9.71762
1836	-9.4425	-7.04201	-10.0536	-8.5478	-9.7401
1837	-9.52	-7.04201	-10.0536	-8.5478	-9.75792
1838	-9.40375	-7.04201	-10.0536	-8.5478	-9.74436
1839	-9.80675	-7.04201	-10.0536	-8.5478	-9.73158
1840	-10.3027	-7.04201	-10.0536	-8.5478	-9.79086
1841	-11.38	-7.04201	-10.0536	-8.5478	-9.87262
1842	-10.5972	-7.04201	-10.0536	-8.5478	-9.92416
1843	-11.3335	-7.04201	-10.0536	-8.5478	-9.86797
1844	-11.1475	-7.04201	-10.0536	-8.5478	-9.78931
1845	-10.9305	-7.04201	-10.0536	-8.5478	-9.73545
1846	-9.65175	-7.04201	-10.0536	-8.5478	-9.76296
1847	-9.892	-7.04201	-10.0536	-8.5478	-9.768
1848	-8.7605	-7.04201	-10.0536	-8.5478	-9.72382
1849	-8.78375	-7.04201	-10.0536	-8.5478	-9.70949
1850	-10.1555	-7.04201	-10.0536	-8.5478	-9.706
1851	-10.2485	-7.04201	-10.0536	-8.5478	-9.59673
1852	-9.8145	-7.04201	-10.0536	-8.5478	-9.46226
1853	-8.063	-7.04201	-10.0536	-8.5478	-9.30184
1854	-7.76075	-7.04201	-10.0536	-8.5478	-9.10499
1855	-7.71425	-7.04201	-10.0536	-8.5478	-9.01005
1856	-9.99275	-7.04201	-10.0536	-8.5478	-8.96898
1857	-9.62075	-7.04201	-10.0536	-8.5478	-8.93526
1858	-8.52025	-7.04201	-10.0536	-8.5478	-8.97866
1859	-9.52	-7.04201	-10.0536	-8.5478	-9.06043
1860	-10.233	-7.04201	-10.0536	-8.5478	-9.05578
1861	-9.1945	-7.04201	-10.0536	-8.5478	-9.04958
1862	-7.908	-7.04201	-10.0536	-8.5478	-9.04066
1863	-8.125	-7.04201	-10.0536	-8.5478	-9.13405
1864	-7.2105	-7.04201	-10.0536	-8.5478	-9.2379
1865	-9.03175	-7.04201	-10.0536	-8.5478	-9.37352
1866	-8.83025	-7.04201	-10.0536	-8.5478	-9.42041
1867	-9.21775	-7.04201	-10.0536	-8.5478	-9.42041
1868	-9.6285	-7.04201	-10.0536	-8.5478	-9.48706
1869	-10.419	-7.04201	-10.0536	-8.5478	-9.56495
1870	-10.0625	-7.04201	-10.0536	-8.5478	-9.58975
1871	-10.1245	-7.04201	-10.0536	-8.5478	-9.63121
1872	-9.63625	-7.04201	-10.0536	-8.5478	-9.77381
1873	-9.93075	-7.04201	-10.0536	-8.5478	-9.94586
1874	-9.83775	-7.04201	-10.0536	-8.5478	-10.102
1875	-10.4268	-7.04201	-10.0536	-8.5478	-10.2256
1876	-10.9305	-7.04201	-10.0536	-8.5478	-10.3442
1877	-9.62075	-7.04201	-10.0536	-8.5478	-10.4097
1878	-9.85325	-7.04201	-10.0536	-8.5478	-10.3589
1879	-11.0777	-7.04201	-10.0536	-8.5478	-10.2853
1880	-10.729	-7.04201	-10.0536	-8.5478	-10.1954
1881	-10.0237	-7.04201	-10.0536	-8.5478	-10.0803
1882	-10.76	-7.04201	-10.0536	-8.5478	-10.0962
1883	-11.566	-7.04201	-10.0536	-8.5478	-10.0551
1884	-10.3337	-7.04201	-10.0536	-8.5478	-10.0051
1885	-11.504	-7.04201	-10.0536	-8.5478	-9.96291
1886	-11.2018	-7.04201	-10.0536	-8.5478	-9.91641
1887	-10.5275	-7.04201	-10.0536	-8.5478	-9.86449
1888	-8.61325	-7.04201	-10.0536	-8.5478	-9.89742
1889	-8.9465	-7.04201	-10.0536	-8.5478	-9.86371
1890	-8.2645	-7.04201	-10.0536	-8.5478	-9.82419
1891	-7.82275	-7.04201	-10.0536	-8.5478	-9.7618
1892	-9.954	-7.04201	-10.0536	-8.5478	-9.7246
1893	-9.10925	-7.04201	-10.0536	-8.5478	-9.6037
1894	-8.838	-7.04201	-10.0536	-8.5478	-9.5944
1895	-9.582	-7.04201	-10.0536	-8.5478	-9.52891
1896	-10.0005	-7.04201	-10.0536	-8.5478	-9.43979
1897	-8.58225	-7.04201	-10.0536	-8.5478	-9.4115
1898	-10.512	-7.04201	-10.0536	-8.5478	-9.44056
1899	-10.4035	-7.04201	-10.0536	-8.5478	-9.47505
1900	-9.9385	-7.04201	-10.0536	-8.5478	-9.5231
1901	-8.776	-7.04201	-10.0536	-8.5478	-9.6037
1902	-10.016	-7.04201	-10.0536	-8.5478	-9.56263
1903	-9.148	-7.04201	-10.0536	-8.5478	-9.66183
1904	-10.1477	-7.04201	-10.0536	-8.5478	-9.71143
1905	-10.1943	-7.04201	-10.0536	-8.5478	-9.72111
1906	-9.41925	-7.04201	-10.0536	-8.5478	-9.71026
1907	-9.96175	-7.04201	-10.0536	-8.5478	-9.7432
1908	-9.1945	-7.04201	-10.0536	-8.5478	-9.63664
1909	-9.63625	-7.04201	-10.0536	-8.5478	-9.64981
1910	-9.2255	-7.04201	-10.0536	-8.5478	-9.59207
1911	-9.43475	-7.04201	-10.0536	-8.5478	-9.63702
1912	-9.1325	-7.04201	-10.0536	-8.5478	-9.58781
1913	-11.0932	-7.04201	-10.0536	-8.5478	-9.55139
1914	-9.83	-7.04201	-10.0536	-8.5478	-9.52775
1915	-9.77575	-7.04201	-10.0536	-8.5478	-9.52039
1916	-9.7835	-7.04201	-10.0536	-8.5478	-9.44986
1917	-9.241	-7.04201	-10.0536	-8.5478	-9.36113
1918	-8.38075	-7.04201	-10.0536	-8.5478	-9.34369
1919	-10.667	-7.04201	-10.0536	-8.5478	-9.29409
1920	-8.78375	-7.04201	-10.0536	-8.5478	-9.24294
1921	-9.675	-7.04201	-10.0536	-8.5478	-9.19915
1922	-9.03175	-7.04201	-10.0536	-8.5478	-9.20884
1923	-8.4195	-7.04201	-10.0536	-8.5478	-9.13095
1924	-9.675	-7.04201	-10.0536	-8.5478	-9.10886
1925	-10.047	-7.04201	-10.0536	-8.5478	-9.06585
1926	-8.00875	-7.04201	-10.0536	-8.5478	-9.01392
1927	-8.187	-7.04201	-10.0536	-8.5478	-9.01005
1928	-8.84575	-7.04201	-10.0536	-8.5478	-9.01548
1929	-8.64425	-7.04201	-10.0536	-8.5478	-8.838
1930	-8.2025	-7.04201	-10.0536	-8.5478	-8.77368
1931	-8.559	-7.04201	-10.0536	-8.5478	-8.75585
1932	-9.32625	-7.04201	-10.0536	-8.5478	-8.6954
1933	-9.5355	-7.04201	-10.0536	-8.5478	-8.70586
1934	-9.38825	-7.04201	-10.0536	-8.5478	-8.61131
1935	-8.9155	-7.04201	-10.0536	-8.5478	-8.45515
1936	-8.745	-7.04201	-10.0536	-8.5478	-8.42105
1937	-9.1635	-7.04201	-10.0536	-8.5478	-8.3296
1938	-8.48925	-7.04201	-10.0536	-8.5478	-8.13314
1939	-7.1175	-7.04201	-10.0536	-8.5478	-8.15329
1940	-7.49725	-7.04201	-10.0536	-8.5478	-8.09167
1941	-9.3185	-7.04201	-10.0536	-8.5478	-8.01844
1942	-7.82275	-7.04201	-10.0536	-8.5478	-7.9235
1943	-8.62875	-7.04201	-10.0536	-8.5478	-7.82585
1944	-7.784	-7.04201	-10.0536	-8.5478	-7.69023
1945	-6.92375	-7.04201	-10.0536	-8.5478	-7.62784
1946	-7.32675	-7.04201	-10.0536	-8.5478	-7.5422
1947	-6.358	-7.04201	-10.0536	-8.5478	-7.41549
1948	-4.9165	-7.04201	-10.0536	-8.5478	-7.41045
1949	-9.04725	-7.04201	-10.0536	-8.5478	-7.40076
1950	-6.97025	-7.04201	-10.0536	-8.5478	-7.39262
1951	-7.09425	-7.04201	-10.0536	-8.5478	-7.31861
1952	-7.4275	-7.04201	-10.0536	-8.5478	-7.18609
1953	-7.5825	-7.04201	-10.0536	-8.5478	-7.04736
1954	-6.67575	-7.04201	-10.0536	-8.5478	-7.06519
1955	-7.66775	-7.04201	-10.0536	-8.5478	-7.15083
1956	-7.03225	-7.04201	-10.0536	-8.5478	-7.16051
1957	-6.62925	-7.04201	-10.0536	-8.5478	-7.257
1958	-8.3885	-7.04201	-10.0536	-8.5478	-7.39921
1959	-6.92375	-7.04201	-10.0536	-8.5478	-7.31745
1960	-7.3345	-7.04201	-10.0536	-8.5478	-7.32753
1961	-7.83825	-7.04201	-10.0536	-8.5478	-7.26088
1962	-5.17225	-7.04201	-10.0536	-8.5478	-7.19461
1963	-5.85425	-7.04201	-10.0536	-8.5478	-7.21321
1964	-8.1405	-7.04201	-10.0536	-8.5478	-7.13726
1965	-8.6365	-7.04201	-10.0536	-8.5478	-7.12641
1966	-7.5205	-7.04201	-10.0536	-8.5478	-7.19384
1967	-8.28775	-7.04201	-10.0536	-8.5478	-7.20546
1968	-7.76075	-7.04201	-10.0536	-8.5478	-7.18493
1969	-7.412	-7.04201	-10.0536	-8.5478	-7.21709
1970	-7.17175	-7.04201	-10.0536	-8.5478	-7.11866
1971	-5.76125	-7.04201	-10.0536	-8.5478	-7.03419
1972	-6.10225	-7.04201	-10.0536	-8.5478	-7.08805
1973	-7.9545	-7.04201	-10.0536	-8.5478	-6.97955
1974	-5.15675	-7.04201	-10.0536	-8.5478	-6.88268
1975	-7.45075	-7.04201	-10.0536	-8.5478	-6.76178
1976	-8.38075	-7.04201	-10.0536	-8.5478	-6.68505
1977	-6.86175	-7.04201	-10.0536	-8.5478	-6.49905
1978	-7.97775	-7.04201	-10.0536	-8.5478	-6.38823
1979	-7.567	-7.04201	-10.0536	-8.5478	-6.31189
1980	-5.366	-7.04201	-10.0536	-8.5478	-6.16929
1981	-6.14875	-7.04201	-10.0536	-8.5478	-6.13441
1982	-6.2495	-7.04201	-10.0536	-8.5478	-6.09954
1983	-3.68425	-7.04201	-10.0536	-8.5478	-6.0325
1984	-6.203	-7.04201	-10.0536	-8.5478	-6.06815
1985	-6.2185	-7.04201	-10.0536	-8.5478	-5.97011
1986	-5.986	-7.04201	-10.0536	-8.5478	-5.74614
1987	-4.56775	-7.04201	-10.0536	-8.5478	-5.78915
1988	-5.54425	-7.04201	-10.0536	-8.5478	-5.6512
1989	-5.88525	-7.04201	-10.0536	-8.5478	-5.51054
1990	-4.31975	-7.04201	-10.0536	-8.5478	-5.63531
1991	-5.06375	-7.04201	-10.0536	-8.5478	-5.63802
1992	-5.40475	-7.04201	-10.0536	-8.5478	-5.52061
1993	-6.61375	-7.04201	-10.0536	-8.5478	-5.8093
1994	-5.86975	-7.04201	-10.0536	-8.5478	-5.86278
1995	-5.49	-7.04201	-10.0536	-8.5478	-5.85541
1996	-3.90125	-7.04201	-10.0536	-8.5478	-5.92013
1997	-7.722	-7.04201	-10.0536	-8.5478	-6.05343
1998	-5.21875	-7.04201	-10.0536	-8.5478	-5.92284
1999	-4.75375	-7.04201	-10.0536	-8.5478	-5.83526
2000	-7.8615	-7.04201	-10.0536	-8.5478	-5.89649
2001	-6.203	-7.04201	-10.0536	-8.5478	-5.986
2002	-3.90125	-7.04201	-10.0536	-8.5478	-5.96159
2003	-9.458	-7.04201	-10.0536	-8.5478	-5.8806
2004	-7.2725	-7.04201	-10.0536	-8.5478	-5.89029
2005	-6.07125	-7.04201	-10.0536	-8.5478
2006	-7.28025	-7.04201	-10.0536	-8.5478
2007	-7.23375	-7.04201	-10.0536	-8.5478
2008	-2.9325	-7.04201	-10.0536	-8.5478
2009	-4.13375	-7.04201	-10.0536	-8.5478
2010	-5.54425	-7.04201	-10.0536	-8.5478
2011	-6.854	-7.04201	-10.0536	-8.5478
2012	-4.9165	-7.04201	-10.0536	-8.5478
2013	-4.994	-7.04201	-10.0536	-8.5478
2014	-6.0635	-7.04201	-10.0536	-8.5478
	-8.5478
